# Supplementary material for: Preparation of hydrophobic CaCO3composite particles by mineralization with sodium trisilanolate in a methanol solution
Source: Royal Society of Chemistry journal article supplement (doi:10.1039/b204490k), 2002-01-01
Supplement: b204490k.pdf [file b204490k.pdf]

**(Electronic Supplementary Information)**

**Preparation of Hydrophobic CaCO<sub>3</sub> Composite Particles by  
Mineralization with Sodium Trisilanolate in a Methanol Solution**

**Dong-Ki Keum, Kyung-Min Kim, Kensuke Naka<sup>\*</sup>, and Yoshiki Chujo<sup>\*</sup>**

*Department of Polymer Chemistry, Graduate School of Engineering, Kyoto University,  
Yoshida, Sakyo-ku, Kyoto, 606-8501, Japan. E-mail: ken@chujo.synchem.kyoto-u.ac.jp*

**Figure S1.** SEM micrography of surface from a T0/PS composite.

**Figure S2.** SEM micrography of surface from a T01/PS composite.

**Figure S3.** SEM micrography of surface from a T025/PS composite.

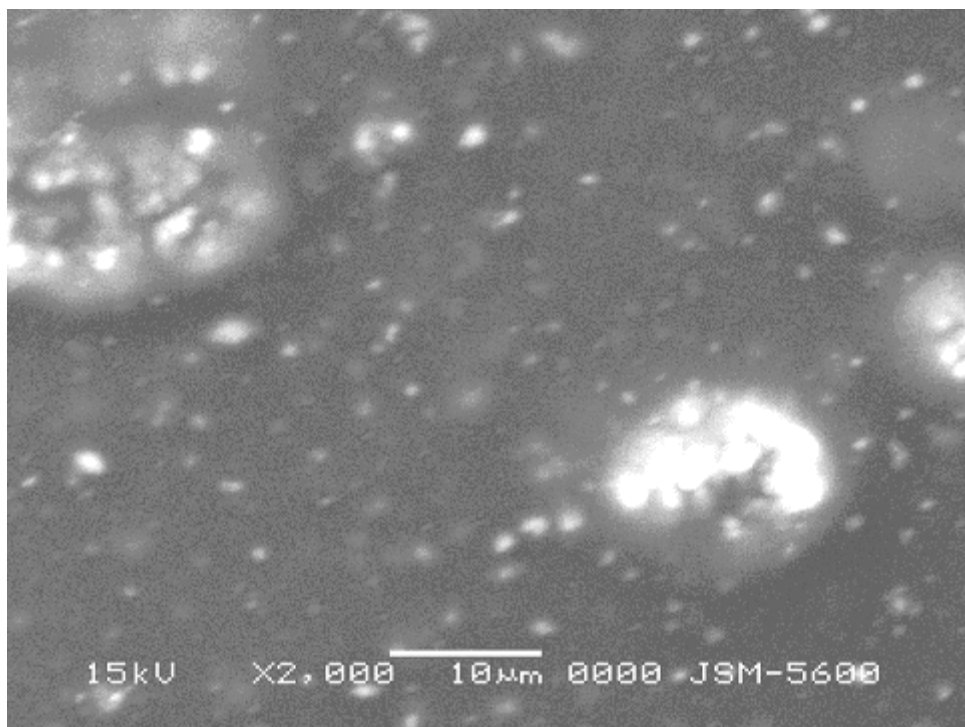

**Figure S1**

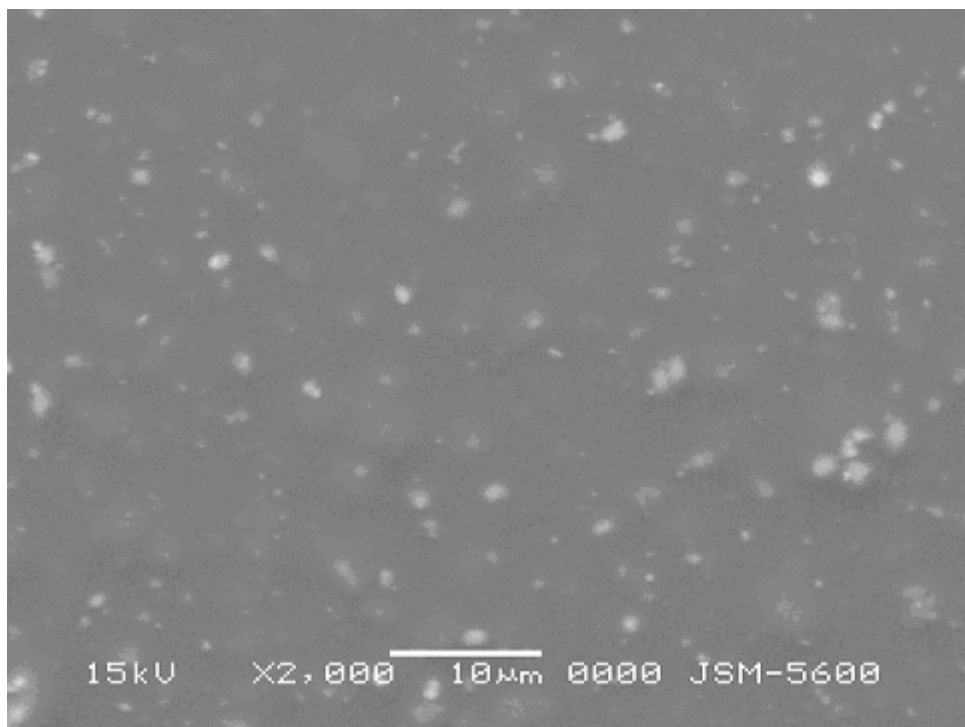

**Figure S2**

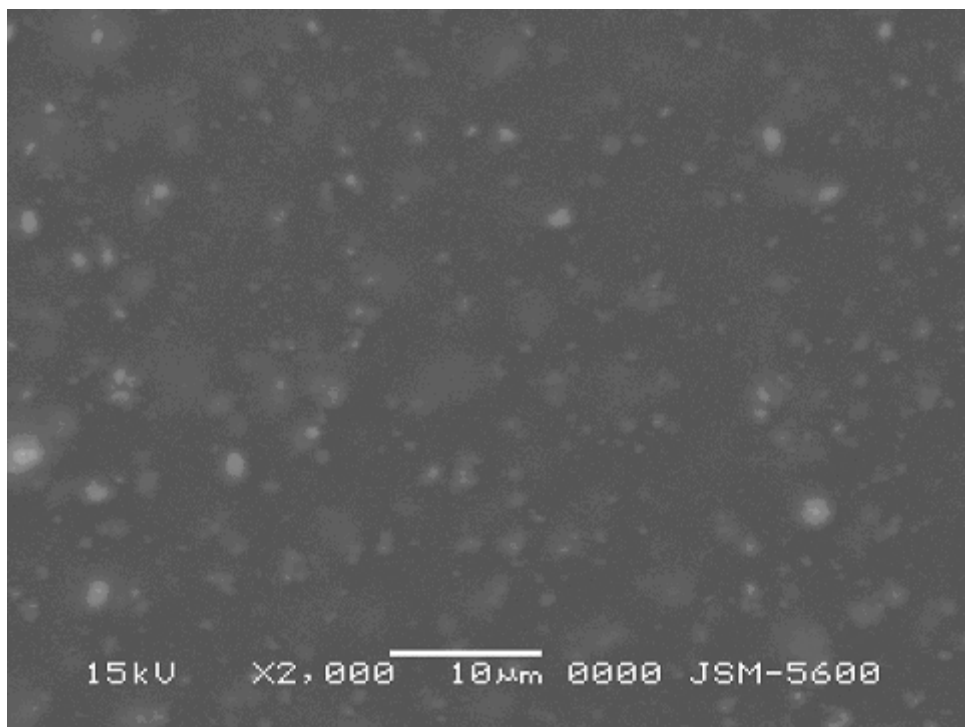

**Figure S3**
